# Supplementary material
Source: PubMed Central journal article supplement (PMC6447465)
Supplement: NIHMS991926-supplement-1.pdf [file NIHMS991926-supplement-1.pdf]

## Regional Prefrontal Resting State Functional Connectivity in Posttraumatic Stress Disorder

### *Supplement*

#### SUPPLEMENTARY METHODS

##### *Participants*

Exclusion criteria included history of neurological disorder (including head injury with loss of consciousness over 5 minutes), use of psychotropic medications (aside from a stable dose of an SSRI or SNRI; this occurred in 1 TENC and 2 PTSD participants), alcohol or substance dependence within the past 5 years, past-year alcohol or substance abuse, contraindications to MRI scanning, or positive urine toxicology screen. Additionally, lifetime diagnosis of bipolar disorder, schizophrenia spectrum disorder, psychosis, anorexia nervosa, or obsessive compulsive disorder was exclusionary. Doctoral-level clinical psychologists administered the Structured Clinical Interview for DSM-IV Axis I Disorders (SCID-I/P) to all participants, and the Clinician Administered PTSD Scale (CAPS-DX) to TENC and PTSD participants. This study entailed a two-day protocol involving interviews, questionnaires, imaging, and a fear conditioning paradigm (not discussed here).

##### *MR image acquisition*

Neuroimaging was performed on a 3.0 Tesla Siemens TIM Trio scanner (Siemens, Erlangen, Germany) using a 32-channel head coil. The scanning protocol included structural scans, followed by resting state scans, followed by magnetic resonance spectroscopy (not reported here). Resting state was collected eyes open using standardized instructions ("For this scan, we want you to rest quietly with your eyes open and let your mind wander. Do not move and do not fall asleep. Just let your mind daydream for

the next 6 to 7 minutes as the scanner operates. Do you have any questions?”). The scan was 6 minutes, 4 seconds long.

#### *Image processing and analysis: detailed methods*

Preprocessing was conducted in SPM12, using standard preprocessing steps: realignment and unwarping, slice timing correction, coregistration, segmentation, spatial normalization, smoothing (FWHM = 6mm), and reslicing at a resolution of 2 x 2 x 2 mm. For each participant, scan time points with excessive head motion or global signal intensity spikes were flagged using Artifact Detection Tools (ART, [www.nitrc.org/projects/artifact\\_detect](http://www.nitrc.org/projects/artifact_detect)). The threshold for head motion was > 1 mm motion from the previous frame; the threshold for signal intensity was > 3 SD from mean intensity. The first scan volume was also flagged for all participants to address possible initial magnetic field inhomogeneity. At the first level, outlier time points were removed via inclusion of a dummy-coded regressor (1 for outlier volumes, 0 for included volumes) to remove outlier volumes from the analysis. Motion parameters also were included, including translation parameters (n = 3), rotation parameters (n = 3), and a parameter reflecting maximum movement between scans (n = 1). All of these motion-related regressors were included for each participant in the denoising step in conn.

#### *FreeSurfer*

The Desikan-Killiany atlas (1) was used to derive thickness of the precuneus. We opted to use the Desikan-Killiany atlas for the precuneus because the ROIs are somewhat broader (including both gyri and adjacent sulcal banks), and we had no specific hypotheses about gyri vs sulcal banks. However, we were not able to determine a well-validated method to delineate the DLPFC using the Desikan-Killiany atlas. Therefore, we used the Destrieux atlas (2) to derive the DLPFC, using the method delineated in Yamagishi et al., 2016 (3). Cortical thickness of the DLPFC was derived using the Destrieux atlas (2) by

combining the thickness measurements of the middle frontal gyrus and sulcus, superior frontal gyrus and sulcus, and inferior frontal sulcus (3). A weighted average was computed using each participant's area measurement for that region in order to compute average cortical thickness across the combined DLPFC region.

## **SUPPLEMENTARY RESULTS**

### *Participant characteristics*

Within the PTSD sample, trauma types were diverse and included witnessing a terrorist attack (n = 2), witnessing unexpected death of a loved one (n = 2), witnessing an assault (n = 3), motor vehicle accident (n = 2), sexual assault or abuse (n = 4), physical assault or abuse (n = 4), torture (n = 1), witnessing an accident resulting in severe injuries to a family member (n = 1), and being chased with a weapon (n = 2). All individuals in the PTSD group met full DSM-IV criteria for current PTSD. No individuals in the HC or TENC groups met criteria for lifetime PTSD. Individuals reporting a history of head injury with loss of consciousness greater than 5 minutes were excluded, but the study did not include comprehensive assessment for lifetime history of head injuries without loss of consciousness.

### *Group difference analysis controlling for trauma load*

As noted in Table 1, the PTSD group endorsed significantly higher lifetime trauma load (LEC score) than the TENC group. Therefore, we ran a univariate model with right DLPFC-precuneus rsFC as the dependent variable and age, sex, LEC, and group as independent variables. After controlling for effects of LEC, group remained significantly associated with rsFC,  $F(2,81) = 10.201$ ,  $p < 0.001$ . (LEC was not significantly associated with rsFC,  $F(1, 81) = 1.527$ ,  $p = 0.220$ ). This analysis provides reassurance that the group effects reported in this paper are not attributable to trauma load.

*Group difference analysis controlling for trauma load*

As noted in Table 1, the PTSD group endorsed significantly higher depression severity (BDI score) than the TENC group. Therefore, we ran a univariate model with right DLPFC-precuneus rsFC as the dependent variable and age, sex, BDI, and group as independent variables. After controlling for effects of BDI, group remained significantly associated with rsFC,  $F(2,80) = 5.931$ ,  $p = 0.004$ . (BDI was not significantly associated with rsFC,  $F(1, 80) = 0.684$ ,  $p = 0.411$ ). This analysis provides reassurance that the group effects reported in this paper are not attributable to depression severity.

Supplementary Table S1. Partial correlations between right DLPFC-precuneus rsFC and symptom scores within the PTSD sample (n = 21), controlling for age and sex

| Measure                                     | Partial r, p      |
|---------------------------------------------|-------------------|
| <b><i>Main clinical outcome measure</i></b> |                   |
| CAPS total                                  | -0.463, p = 0.046 |
| CAPS re-exp.                                | -0.407, p = 0.083 |
| CAPS avoidance                              | -0.485, p = 0.035 |
| CAPS hyperarousal                           | -0.130, p = 0.595 |
| <b><i>Secondary measures</i></b>            |                   |
| ACE total                                   | 0.021, p = 0.931  |
| CTQ emotional abuse                         | -0.082, p = 0.739 |
| CTQ physical abuse                          | -0.128, p = 0.600 |
| CTQ sexual abuse                            | 0.154, p = 0.530  |
| CTQ emotional neglect                       | -0.325, p = 0.175 |
| CTQ physical neglect                        | -0.266, p = 0.271 |
| LEC total                                   | 0.010, p = 0.968  |
| BDI total <sup>a</sup>                      | -0.252, p = 0.313 |

<sup>a</sup> n = 20, one missing data point

**Supplementary Table S2. Precuneus result participation in Yeo 17-network parcellation**

|                                | Network Label<br>(Baker et al.,<br>2014)(4, 5) | Cerebral cortical regions (Yeo et al., 2011;<br>Baker et al., 2014)(4–6)                                                                                                      | # nonzero voxels |
|--------------------------------|------------------------------------------------|-------------------------------------------------------------------------------------------------------------------------------------------------------------------------------|------------------|
| 1                              | Visual peripheral                              | Striate, extrastriate                                                                                                                                                         | 0                |
| 2                              | Visual central                                 | Striate, extrastriate                                                                                                                                                         | 128              |
| 3                              | Somatomotor A                                  | Central sulcus, secondary somatosensory                                                                                                                                       | 0                |
| 4                              | Somatomotor B                                  | Central sulcus, secondary somatosensory,<br>insula, auditory                                                                                                                  | 0                |
| 5                              | Dorsal attention A                             | Posterior temporal occipital, superior<br>parietal, inferior parietal occipital                                                                                               | 0                |
| 6                              | Dorsal attention B                             | Posterior temporal, postcentral gyrus,<br>frontal eye fields, precentral ventral frontal                                                                                      | 0                |
| 7                              | Ventral attention                              | Parietal operculum, medial parietal, medial<br>frontal, precentral ventral frontal, insula,<br>temporal, precentral frontal, posterior<br>temporal                            | 0                |
| 8                              | Saliency                                       | Medial posterior prefrontal, ventral<br>prefrontal, cingulate sulcus, inferior<br>parietal, lateral prefrontal                                                                | 0                |
| 9-10                           | Limbic                                         | Temporal pole, orbitofrontal                                                                                                                                                  | 0                |
| 11                             | Control C                                      | Precuneus, posterior cingulate                                                                                                                                                | 516              |
| 12                             | Control A                                      | Intraparietal sulcus, lateral prefrontal,<br>posterior temporal, dorsal prefrontal,<br>cingulate, orbitofrontal, medial posterior<br>prefrontal, lateral posterior prefrontal | 0                |
| 13                             | Control B                                      | Lateral posterior prefrontal, lateral anterior<br>prefrontal, inferior parietal, temporal,<br>medial posterior prefrontal                                                     | 0                |
| 14                             | Default D (Auditory)                           | Temporal cortex                                                                                                                                                               | 0                |
| 15                             | Default C                                      | Retrosplenial, parahippocampal complex,<br>ventral inferior parietal                                                                                                          | 0                |
| 16                             | Default A                                      | Medial prefrontal, posterior inferior<br>parietal, posterior cingulate, dorsal<br>prefrontal, orbitofrontal, temporal                                                         | 66               |
| 17                             | Default B                                      | Dorsal prefrontal, temporal, anterior<br>inferior parietal                                                                                                                    | 0                |
| Voxels<br>outside Yeo<br>parc. |                                                |                                                                                                                                                                               | 1282             |
| Total voxels                   |                                                |                                                                                                                                                                               | 1992             |

Table S2 method: The precuneus result was transformed to 1mm isotropic space and then multiplied by each of the Yeo et al. (2011) 17 resting state functional networks; the number of non-zero voxels was used to assess network membership.

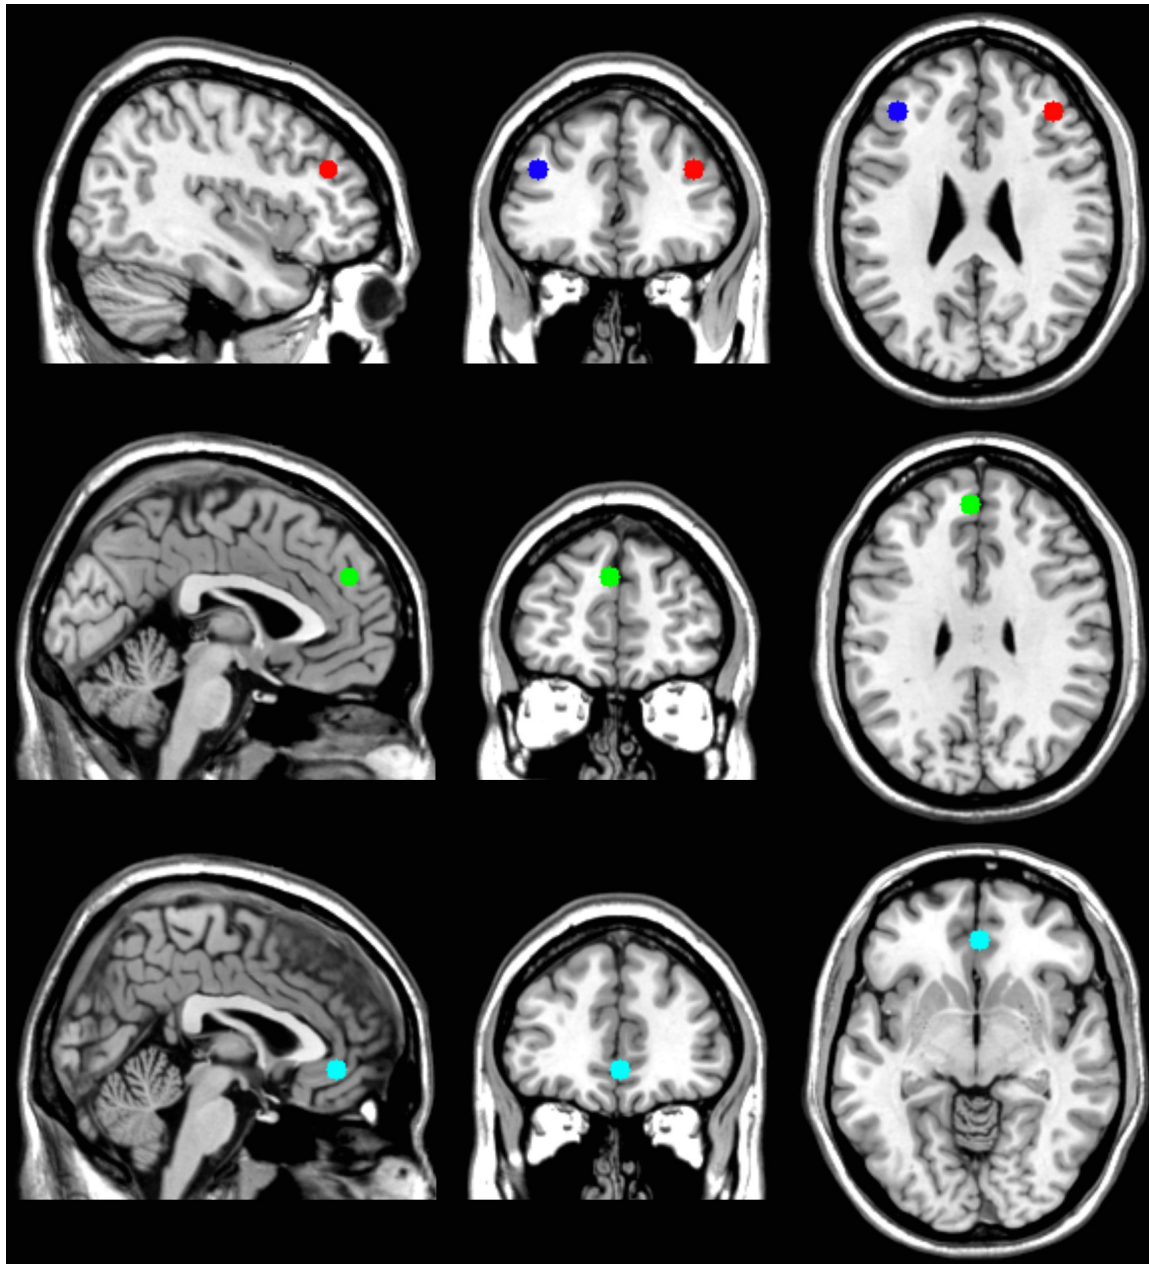

**Supplementary Figure S1.** Seeds used for rsFC analysis. Red: right DLPFC (39, 37, 26); blue: left DLPFC (-39, 37, 26); green: DMPFC (-3, 48, 30); cyan: VMPFC (2, 41, -6). Spheres of 5mm radius were inflated around the peak coordinates and binarized to create ROIs.

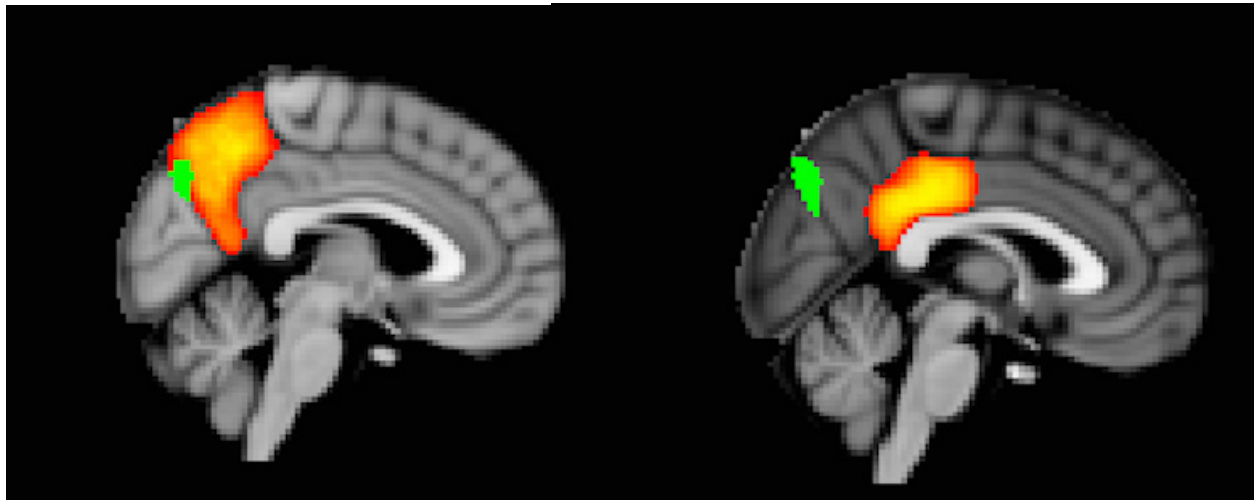

**Supplementary Figure S2.** Location of the present finding in relation to precuneus cortex (left) and posterior cingulate cortex (right). Regions drawn from the Harvard-Oxford Cortical Structural Atlas, thresholded at 40% probability.



## Supplemental References

1. Desikan RS, Ségonne F, Fischl B, Quinn BT, Dickerson BC, Blacker D, *et al.* (2006): An automated labeling system for subdividing the human cerebral cortex on MRI scans into gyral based regions of interest. *Neuroimage*. 31: 968–980.
2. Fischl B, Van Der Kouwe A, Destrieux C, Halgren E, Ségonne F, Salat DH, *et al.* (2004): Automatically Parcellating the Human Cerebral Cortex. *Cereb Cortex*. 14: 11–22.
3. Yamagishi T, Takagishi H, Fermin A de SR, Kanai R, Li Y, Matsumoto Y (2016): Cortical thickness of the dorsolateral prefrontal cortex predicts strategic choices in economic games. *Proc Natl Acad Sci*. 113: 5582–5587.
4. Baker JT, Holmes AJ, Masters GA, Yeo BTT, Krienen F, Buckner RL, Öngür D (2014): Disruption of cortical association networks in schizophrenia and psychotic bipolar disorder. *JAMA psychiatry*. 71: 109–18.
5. Shinn AK, Baker JT, Lewandowski KE, Öngür D, Cohen BM (2015): Aberrant cerebellar connectivity in motor and association networks in schizophrenia. *Front Hum Neurosci*. 9: 134.
6. Yeo BTT, Krienen FM, Sepulcre J, Sabuncu MR, Lashkari D, Hollinshead M, *et al.* (2011): The organization of the human cerebral cortex estimated by intrinsic functional connectivity. *J Neurophysiol*. 106: 1125–65.
